# Supplementary material for: Compression Behavior and Vibrational Properties of New Energetic Material LLM-105 Analyzed Using the Dispersion-Corrected Density Functional Theory
Source: MDPI journal article supplement (doi:10.3390/molecules26226831), 2021-11-12
Supplement: s1 [file s1]

## Supporting Information

### **Compression behavior and vibrational properties of new energetic material LLM-105 analyzed using the dispersion-corrected density functional theory**

Tianming Li,<sup>2</sup> Junyu Fan,<sup>1,2,3,\*</sup> Zhuoran Wang,<sup>2</sup> Hanhan Qi,<sup>2</sup> Yan Su,<sup>2,\*</sup> Jijun Zhao<sup>2</sup>

<sup>1</sup>*Department of Physics, Taiyuan Normal University, Taiyuan 030619, China*

<sup>2</sup>*Key Laboratory of Materials Modification by Laser, Ion and Electron Beams (Dalian University of Technology), Ministry of Education, Dalian 116024, China*

<sup>3</sup>*Institute of Computational and Applied Physics, Taiyuan Normal University, Jinzhong 030619, China*

---

\* Corresponding author. E-mail: su.yan@dlut.edu.cn, fanjunyu@tynu.edu.cn

**Table S1.** Characteristics of vibrational modes in LLM-105 crystal at ambient pressure.  $dv/dp$  is slope of pressure-induced Raman shift. Abbreviation: st: stretch, sci: scissor, tw: twist, bre: breathe, def: deformation, sym: symmetric, asym: asymmetric.

| Mode       | Wavenumber/cm <sup>-1</sup> |                |                       | Assignments                                          | $dv/dp/cm^{-1} \text{ GPa}^{-1}$ |                       |
|------------|-----------------------------|----------------|-----------------------|------------------------------------------------------|----------------------------------|-----------------------|
|            | A <sub>g</sub>              | B <sub>g</sub> | Expt. <sup>[S1]</sup> |                                                      | This work                        | Expt. <sup>[S1]</sup> |
| $\nu_1$    | 3456                        | 3456           | 3439                  | NH <sub>2</sub> asym. st.                            | -0.31                            |                       |
| $\nu_2$    | 3414                        | 3416           | 3403                  | NH <sub>2</sub> asym. st.                            | -2.44                            |                       |
| $\nu_3$    | 3257                        | 3257           | 3300                  | NH <sub>2</sub> sym. st.                             | -6.33                            |                       |
| $\nu_4$    | 3238                        | 3245           | 3281                  | NH <sub>2</sub> sym. st.                             | -6.13                            |                       |
| $\nu_5$    | 1614                        | 1620           | 1650                  | NH <sub>2</sub> sci., C-NH <sub>2</sub> st.          | 4.40                             | 5.04                  |
| $\nu_6$    | 1575                        | 1577           | 1643                  | NH <sub>2</sub> sci., C-NH <sub>2</sub> st.          | 3.53                             | 4.86                  |
| $\nu_7$    | 1518                        | 1509           | 1600                  | NH <sub>2</sub> sci.                                 | 3.39                             | 3.96                  |
| $\nu_8$    | 1495                        | 1495           | 1566                  | NH <sub>2</sub> sci.                                 | 3.17                             | 3.42                  |
| $\nu_9$    | 1455                        | 1459           | 1551                  | NH <sub>2</sub> sci., ring def.                      | 4.24                             | 2.70                  |
| $\nu_{10}$ | 1436                        | 1437           | 1519                  | NO <sub>2</sub> st., NH <sub>2</sub> sci., ring def. | 3.23                             | 3.78                  |
| $\nu_{11}$ | 1409                        | 1432           | 1499                  | NH <sub>2</sub> sci., NO <sub>2</sub> st.            | 3.02                             | 3.96                  |
| $\nu_{12}$ | 1393                        | 1408           | 1474                  | NH <sub>2</sub> sci., NO <sub>2</sub> st.            | 1.26                             | 3.96                  |
| $\nu_{13}$ | 1350                        | 1354           | 1456                  | HN <sub>2</sub> rock, ring st.                       | 4.86                             | 2.52                  |
| $\nu_{14}$ | 1333                        | 1337           |                       | HN <sub>2</sub> sci., ring st.                       | 3.79                             |                       |
| $\nu_{15}$ | 1275                        | 1281           | 1378                  | HN <sub>2</sub> rock, ring bre., NO <sub>2</sub> st. | 5.41                             | 5.94                  |
| $\nu_{16}$ | 1249                        | 1249           | 1265                  | HN <sub>2</sub> sci., ring bre., NO <sub>2</sub> st. | 3.13                             | 3.06                  |
| $\nu_{17}$ | 1192                        | 1204           | 1251                  | HN <sub>2</sub> sci., ring def., NO <sub>2</sub> st. | 2.69                             | 2.34                  |
| $\nu_{18}$ | 1158                        | 1167           | 1188                  | NH <sub>2</sub> rock, N-O rock                       | 3.06                             | 3.42                  |
| $\nu_{19}$ | 1078                        | 1081           | 1089                  | HN <sub>2</sub> rock, ring bre.                      | 2.58                             | 3.60                  |
| $\nu_{20}$ | 1039                        | 1040           | 1062                  | NH <sub>2</sub> rock, ring st.                       | 1.49                             | 2.34                  |
| $\nu_{21}$ | 896                         | 898            | 921                   | NH <sub>2</sub> rock, ring st.                       | 1.26                             | 1.71                  |
| $\nu_{22}$ | 869                         | 866            | 893                   | NH <sub>2</sub> rock, ring st., NO <sub>2</sub> st.  | 3.02                             |                       |
| $\nu_{23}$ | 794                         | 791            | 817                   | NH <sub>2</sub> rock, ring st., NO <sub>2</sub> st.  | 1.46                             | 1.59                  |
| $\nu_{24}$ | 739                         | 739            | 759                   | NH <sub>2</sub> rock, ring def., NO <sub>2</sub> st. | 3.93                             | 1.10                  |
| $\nu_{25}$ | 732                         | 732            | 736                   | NH <sub>2</sub> tw., ring def., NO <sub>2</sub> st.  | 1.30                             | 2.45                  |
| $\nu_{26}$ | 715                         | 716            | 715                   | NH <sub>2</sub> st., ring st.                        | 2.66                             | 1.35                  |
| $\nu_{27}$ | 709                         | 713            | 703                   | NH <sub>2</sub> tw.                                  | 1.91                             | 1.84                  |
| $\nu_{28}$ | 696                         | 697            |                       | NH <sub>2</sub> rock, ring def., NO <sub>2</sub> tw. | 2.25                             |                       |
| $\nu_{29}$ | 686                         | 691            |                       | NH <sub>2</sub> tw.                                  | 1.84                             |                       |
| $\nu_{30}$ | 681                         | 681            |                       | NH <sub>2</sub> tw.                                  | 1.89                             |                       |
| $\nu_{31}$ | 673                         | 674            | 637                   | NH <sub>2</sub> tw., ring def., NO <sub>2</sub> tw.  | 0.09                             | 0.98                  |
| $\nu_{32}$ | 617                         | 617            |                       | NH <sub>2</sub> tw.                                  | 2.97                             |                       |
| $\nu_{33}$ | 574                         | 576            | 560                   | NH <sub>2</sub> wag                                  | 5.34                             | 3.92                  |
| $\nu_{34}$ | 552                         | 552            | 544                   | NH <sub>2</sub> wag                                  | 5.30                             | 0.98                  |
| $\nu_{35}$ | 531                         | 533            |                       | NH <sub>2</sub> tw., ring def.                       | 1.63                             |                       |
| $\nu_{36}$ | 530                         | 531            |                       | NH <sub>2</sub> wag                                  | 0.80                             |                       |
| $\nu_{37}$ | 472                         | 476            | 485                   | NH <sub>2</sub> tw., ring def., NO <sub>2</sub> tw.  | 3.63                             | 3.92                  |
| $\nu_{38}$ | 426                         | 426            | 434                   | NH <sub>2</sub> tw., ring def., NO <sub>2</sub> tw.  | 1.13                             | 1.75                  |

|            |     |     |     |                                                       |      |      |
|------------|-----|-----|-----|-------------------------------------------------------|------|------|
| $\nu_{39}$ | 396 | 401 | 415 | HN <sub>2</sub> rock                                  | 1.85 | 2.96 |
| $\nu_{40}$ | 370 | 372 | 379 | HN <sub>2</sub> rock                                  | 3.13 | 2.85 |
| $\nu_{41}$ | 361 | 360 | 354 | HN <sub>2</sub> rock, NO <sub>2</sub> sci.            | 2.48 | 3.95 |
| $\nu_{42}$ | 349 | 346 | 344 | NH <sub>2</sub> st., ring def., NO <sub>2</sub> st.   | 3.14 | 3.07 |
| $\nu_{43}$ | 342 | 339 | 336 | NH <sub>2</sub> tw., ring def., NO <sub>2</sub> tw.   | 3.41 |      |
| $\nu_{44}$ | 332 | 329 | 272 | NH <sub>2</sub> tw., ring def., NO <sub>2</sub> tw.   | 3.17 |      |
| $\nu_{45}$ | 269 | 275 | 267 | NH <sub>2</sub> wag, ring def.                        | 2.35 | 2.74 |
| $\nu_{46}$ | 191 | 210 | 196 | NH <sub>2</sub> tw., ring def., NO <sub>2</sub> rock  | 6.41 |      |
| $\nu_{47}$ | 160 | 180 | 179 | lattice vibration                                     | 9.24 | 6.36 |
| $\nu_{48}$ | 157 | 151 | 172 | lattice vibration                                     | 7.78 |      |
| $\nu_{49}$ | 139 | 130 | 145 | NH <sub>2</sub> tw., ring def., NO <sub>2</sub> tw.   | 8.20 | 6.47 |
| $\nu_{50}$ | 117 | 126 |     | NO <sub>2</sub> rock                                  | 8.36 |      |
| $\nu_{51}$ | 106 | 111 | 110 | lattice vibration                                     | 7.51 | 7.78 |
| $\nu_{52}$ | 103 | 107 | 100 | lattice vibration                                     | 6.89 |      |
| $\nu_{53}$ | 84  | 91  | 88  | lattice vibration                                     | 7.69 | 6.69 |
| $\nu_{54}$ | 77  | 86  | 76  | lattice vibration                                     | 4.06 | 7.13 |
| $\nu_{55}$ | 70  | 72  | 60  | NH <sub>2</sub> rock, ring rock, NO <sub>2</sub> rock | 3.76 | 4.60 |
| $\nu_{56}$ | 61  | 59  | 51  | lattice vibration                                     | 1.34 | 4.28 |
| $\nu_{57}$ | 37  | 29  |     | lattice vibration                                     | 2.20 |      |

---

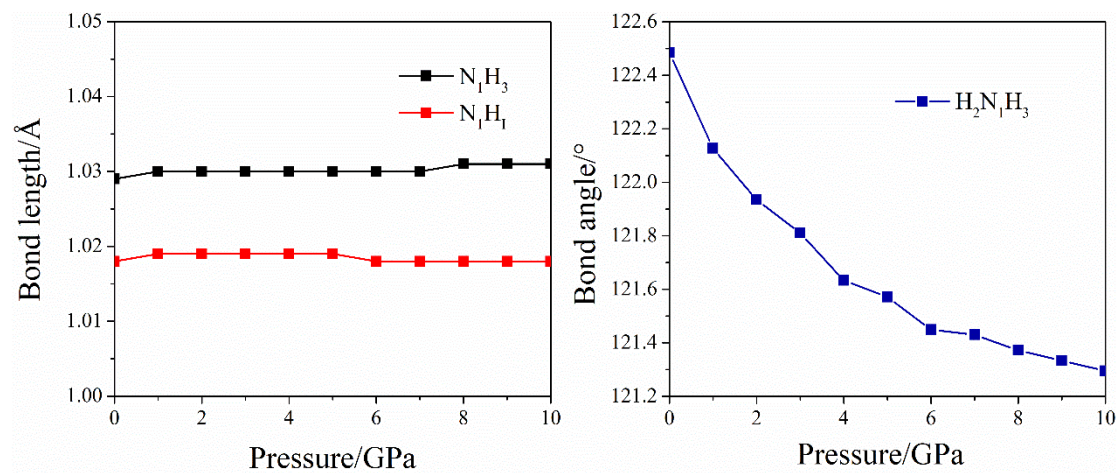

**Figure S1.** The evolutions of NH<sub>2</sub> bond length and angle of LLM-105 molecular under hydrostatic pressure.

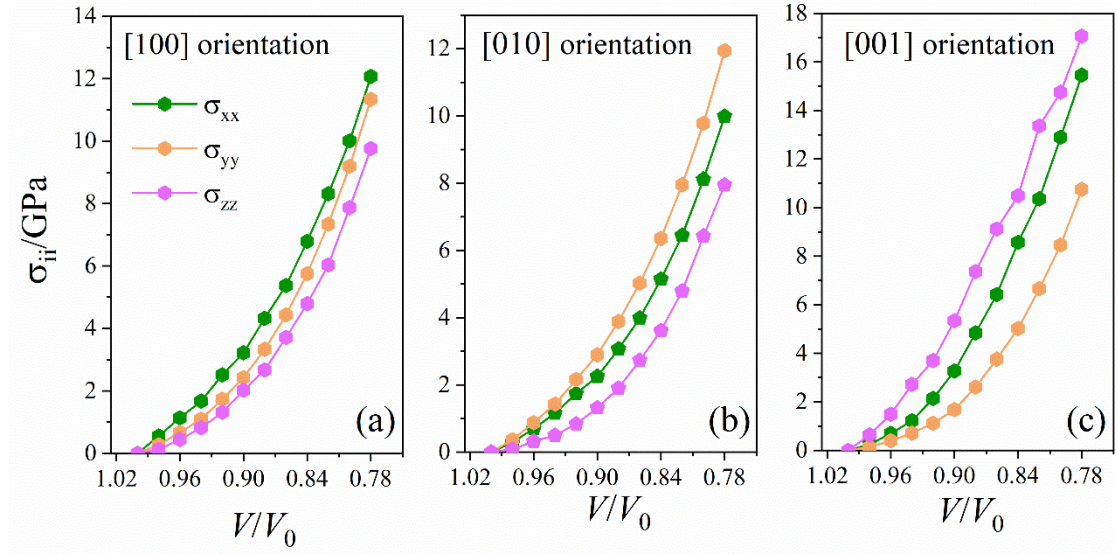

**Figure S2.** Three principal stresses  $\sigma_{xx}$ ,  $\sigma_{yy}$  and  $\sigma_{zz}$  as function of compression ratio  $V/V_0$  under uniaxial loading.

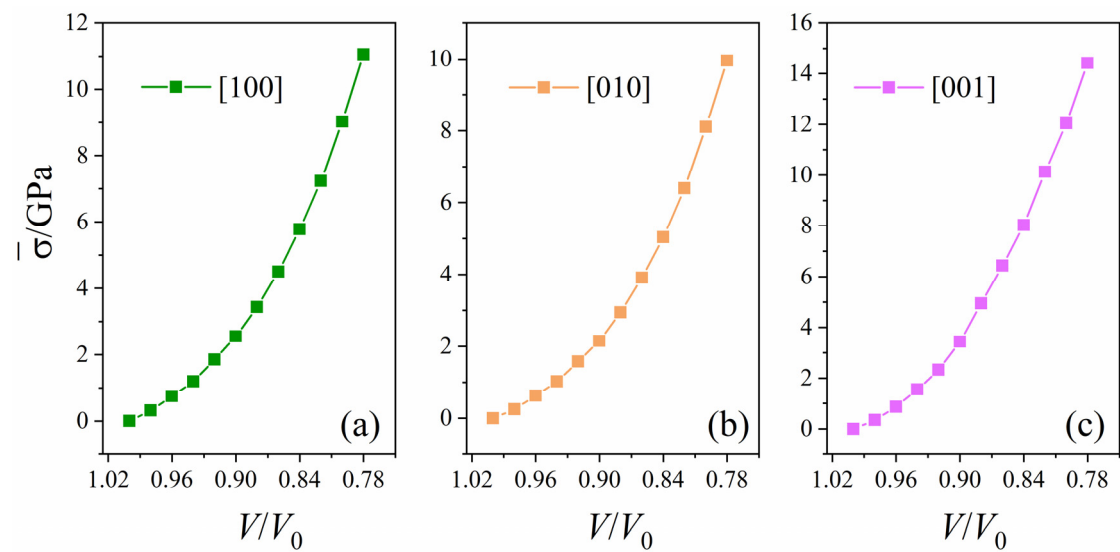

**Figure S3.** The average principal stress  $\bar{\sigma}$  as function of compression ratio  $V/V_0$  under different uniaxial loading.

## References

S1. Xu, Z., et al., Pressure- and Temperature-Dependent Structural Stability of LLM-105 Crystal. *The Journal of Physical Chemistry C* **2018**, 123, 1110-1119.
